# Supplementary material for: Pembrolizumab Plus Chemotherapy Followed by Pembrolizumab in Patients With Early Triple-Negative Breast Cancer: A Secondary Analysis of a Randomized Clinical Trial
Source: PubMed Central journal article supplement — JAMA Netw Open. 2023 Nov 15;6(11):e2342107. doi: 10.1001/jamanetworkopen.2023.42107 (PMC10652156; doi:10.1001/jamanetworkopen.2023.42107), 2023-11-15
Supplement: jamanetwopen-e2342107-s002.pdf [file jamanetwopen-e2342107-s002.pdf]

## Supplementary Online Content

Takahashi M, Cortés J, Dent R, et al. Pembrolizumab plus chemotherapy followed by pembrolizumab in patients with early triple-negative breast cancer: a secondary analysis of a randomized clinical trial. *JAMA Netw Open*. 2023;6(11):e2342107.  
doi:10.1001/jamanetworkopen.2023.42107

**eTable 1.** List of Countries that Enrolled Patients in the Global KEYNOTE-522 Study

**eTable 2.** First EFS Events by Category: Subgroup of Patients Enrolled in Asia

**eFigure.** Overall Survival: Subgroup of Patients Enrolled in Asia

This supplementary material has been provided by the authors to give readers additional information about their work.

**eTable 1.** List of Countries that Enrolled Patients in the Global KEYNOTE-522 Study

---

| <b>Country</b>           |
|--------------------------|
| Australia                |
| Brazil                   |
| Canada                   |
| Columbia                 |
| France                   |
| Germany                  |
| Ireland                  |
| Israel                   |
| Italy                    |
| Japan                    |
| Poland                   |
| Portugal                 |
| Russia                   |
| Singapore                |
| South Korea              |
| Spain                    |
| Sweden                   |
| Taiwan                   |
| Turkey                   |
| United Kingdom           |
| United States of America |

---

**eTable 2.** First EFS Events by Category: Subgroup of Patients Enrolled in Asia

| <b>Event</b>                                                | <b>Pembrolizumab + Chemotherapy/<br/>Pembrolizumab<br/>n = 136</b> | <b>Placebo + Chemotherapy/<br/>Placebo<br/>n = 80</b> |
|-------------------------------------------------------------|--------------------------------------------------------------------|-------------------------------------------------------|
| Any EFS event                                               | 13 (9.6)                                                           | 20 (25.0)                                             |
| Distant recurrence                                          | 8 (5.9)                                                            | 15 (18.8)                                             |
| Local recurrence <sup>a</sup>                               | 1 (0.7)                                                            | 2 (2.5)                                               |
| Progression of disease that<br>precludes definitive surgery | 1 (0.7)                                                            | 2 (2.5)                                               |
| Secondary primary<br>malignancy <sup>b</sup>                | 2 (1.5)                                                            | 0                                                     |
| Death                                                       | 1 (0.7)                                                            | 1 (1.3)                                               |

EFS, event-free survival.

All values are n (%).

<sup>a</sup>One patient in each treatment group had subsequent distant recurrence.

<sup>b</sup>Secondary primary malignancy sites were bone marrow and stomach.

Data cutoff date: March 23, 2021.

eFigure. Overall survival: subgroup of patients enrolled in Asia.

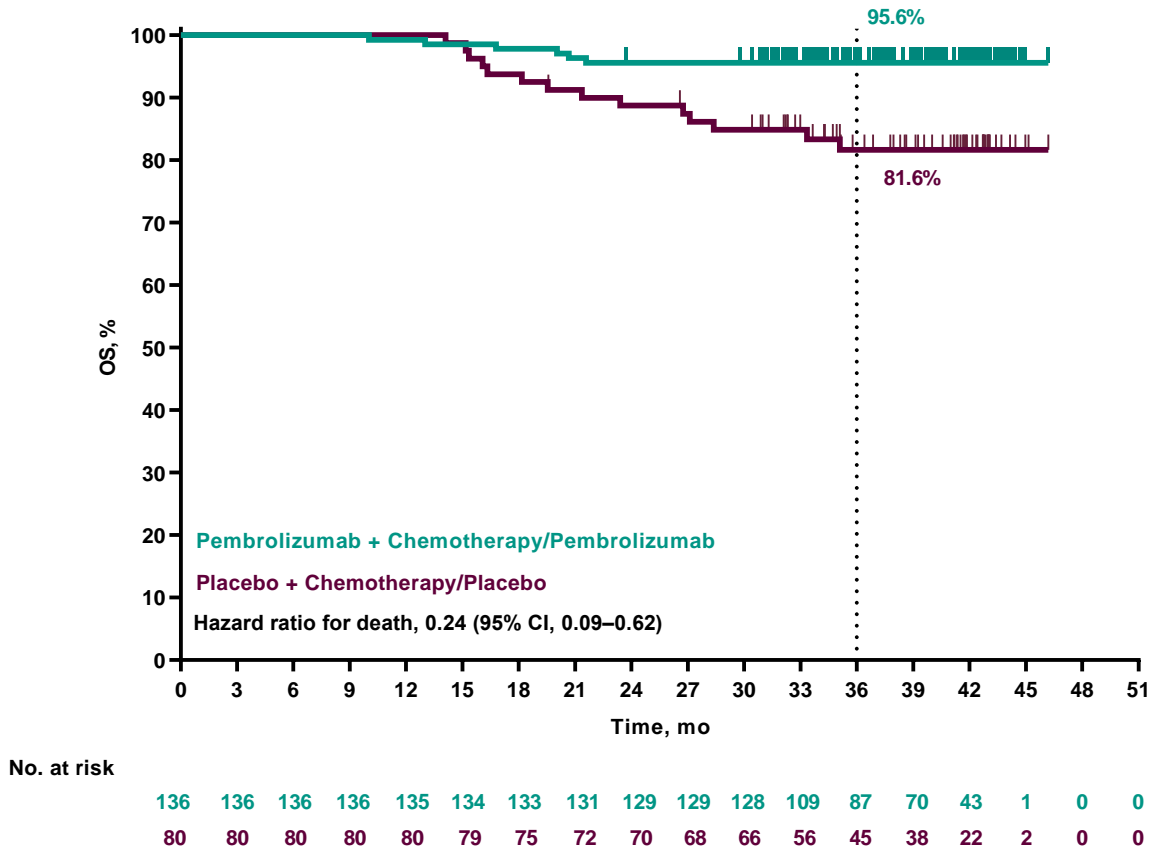

HR, hazard ratio; OS, overall survival.  
Data cutoff date: March 23, 2021.
